# Supplementary material for: Is Zimbabwe ready to transition from anonymous unlinked sero-surveillance to using prevention of mother to child transmission of HIV (PMTCT) program data for HIV surveillance?: results of PMTCT utility study, 2012
Source: BMC Infect Dis. 2016 Feb 29;16:97. doi: 10.1186/s12879-016-1425-2 (PMC4770682; doi:10.1186/s12879-016-1425-2)
Supplement: Additional file 1: Table S1. — Merged Data Set. (PDF 26 kb) [file 12879_2016_1425_MOESM1_ESM.pdf]

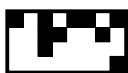

12832

# Ministry of Health & Child Welfare Antenatal Clinic Surveillance 2012

## 1. Survey Number Sticker (big sticker on top)

### INSTRUCTIONS

Please fill in circles like this:

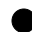

NOT like this:

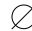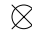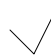

### 2. Age

- 0 ☐ ☐ ☐  
 1 ☐ ☐ ☐  
 2 ☐ ☐ ☐  
 3 ☐ ☐ ☐  
 4 ☐ ☐ ☐  
 5 ☐ ☐ ☐  
 6 ☐ ☐ ☐  
 7 ☐ ☐ ☐  
 8 ☐ ☐ ☐  
 9 ☐ ☐ ☐

### 3. Place of Usual Residence

- ☐ Rural ☐ Mine  
☐ Growth Point ☐ Farm  
☐ Town or City ☐ Resettlement

### 6. Partner's Place of Usual Residence

- ☐ Rural ☐ Farm  
☐ Growth Point ☐ Resettlement  
☐ Town or City ☐ Not known  
☐ Mine ☐ N/A

### 4. Type of Occupation

- ☐ Student  
☐ Housewife  
☐ Unemployed  
☐ Employed (Formal)  
☐ Employed (Informal)

### 5. Partner's Type of Occupation

- ☐ Student  
☐ Unemployed  
☐ Employed (Formal)  
☐ Employed (Informal)  
☐ N/A

### 9. Educational Level

- ☐ None  
☐ Primary  
☐ Secondary (Junior Certificate)  
☐ Secondary (O' Level)  
☐ Secondary (A' Level)  
☐ Tertiary

### 7. Marital Status

- ☐ Married ☐ Separated  
☐ Single ☐ Widowed  
☐ Divorced

### 8. Partner's Educational Level

- ☐ None  
☐ Primary  
☐ Secondary (Junior)  
☐ Secondary (O' Level)  
☐ Secondary (A' Level)  
☐ Tertiary  
☐ N/A

### 10. Genital Ulcer History

a) History of GUD within the past year?

Y N

☐ ☐

b) Presence of GUD on examination

☐ ☐

### 11. HIV Test History

- a) Prior to this visit, have you ever been offered an HIV test? ☐ Yes ☐ No  
 b) Was this HIV test accepted? ☐ Yes ☐ No ☐ N/A  
 c) Did you receive results during post test counseling? ☐ Yes ☐ No ☐ N/A  
 d) Prior to this visit did you ever take ARVs? ☐ Yes ☐ No ☐ N/A

### 12. Currently on ARV

Y N  
☐ ☐

### 13. PMTCT HIV Test - Current Visit

- a) Was an HIV test offered? ☐ Yes ☐ No  
 b) Was this test accepted? ☐ Yes ☐ No ☐ N/A  
 c) What was the HIV test result? ☐ Positive ☐ Negative ☐ N/A

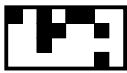

12832

**14. Obstetric Information**

a) Gravida

0 1 2 3 4 5 6 7 8 9  
○ ○ ○ ○ ○ ○ ○ ○ ○ ○

b) No. of Children Alive

○ ○ ○ ○ ○ ○ ○ ○ ○ ○

c) Still Births

○ ○ ○ ○ ○ ○ ○ ○ ○ ○

d) Abortions

○ ○ ○ ○ ○ ○ ○ ○ ○ ○

e) No. of Children dead before  
1st birthday

○ ○ ○ ○ ○ ○ ○ ○ ○ ○

f) No. of children dead between  
1st and 5th birthday

○ ○ ○ ○ ○ ○ ○ ○ ○ ○

g) Parity

○ ○ ○ ○ ○ ○ ○ ○ ○ ○

**15. Lab Results**

D D M M Y Y

Collected  /  / Tested  /  / 

|      | + | - |
|------|---|---|
| HIV  | ○ | ○ |
| RPR  | ○ | ○ |
| TPHA | ○ | ○ |
